# Supplementary material for: High carrier mobility and strong electron–phonon coupling in graphene–WS2 heterobilayers under pressure
Source: Royal Society of Chemistry journal article supplement (doi:10.1039/d3tc03438k), 2023-01-01
Supplement: d3tc03438k1.pdf [file d3tc03438k1.pdf]

## High carrier mobility and strong electron-phonon coupling in graphene-WS<sub>2</sub> heterobilayers by pressure

Jiapeng Zhen<sup>1,2,‡</sup>, Qiushi Huang<sup>3,‡</sup>, Ying Liu<sup>1,2,\*</sup>, Shihui Zhang<sup>4</sup>, Hongliang Dong<sup>4</sup>, Kehong Lv<sup>1,2</sup>, Jing Qiu<sup>1,2,\*</sup>, Guanjun Liu<sup>1,2,\*</sup>

<sup>1</sup>College of Intelligence Science and Technology, National University of Defense Technology, Changsha, Hunan 400713, China

<sup>2</sup>Science and Technology on Integrated Logistics Support Laboratory, National University of Defense Technology, Changsha, Hunan 400713, China

<sup>3</sup>Beijing Computational Science Research Center, Beijing 100093, China

<sup>4</sup>Center for High Pressure Science and Technology Advanced Research, Shanghai 201203, China

\*Email: [liuying@nudt.edu.cn](mailto:liuying@nudt.edu.cn), [qiujin@nudt.edu.cn](mailto:qiujin@nudt.edu.cn), [liu342@nudt.edu.cn](mailto:liu342@nudt.edu.cn)

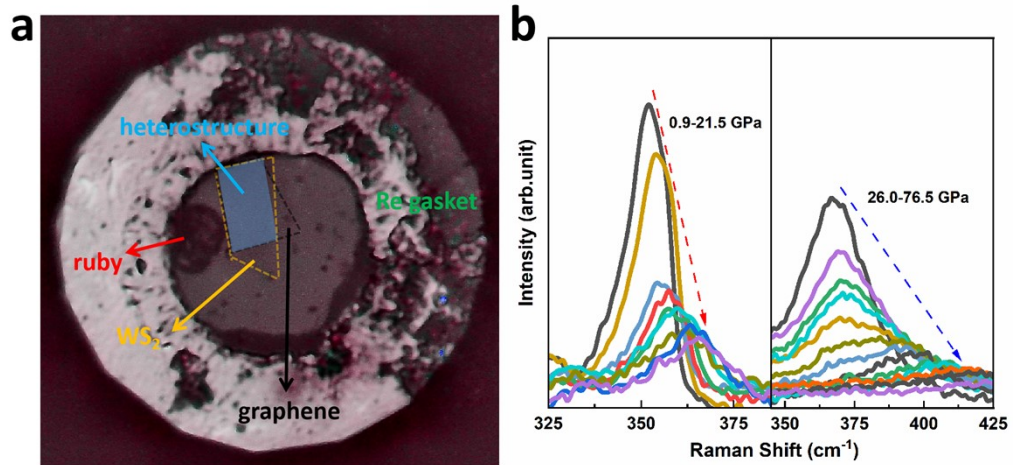

Figure S1: (a) Schematic diagram of heterojunction sample in DAC. (b) The evolution of  $E_{2g}$  with pressure.

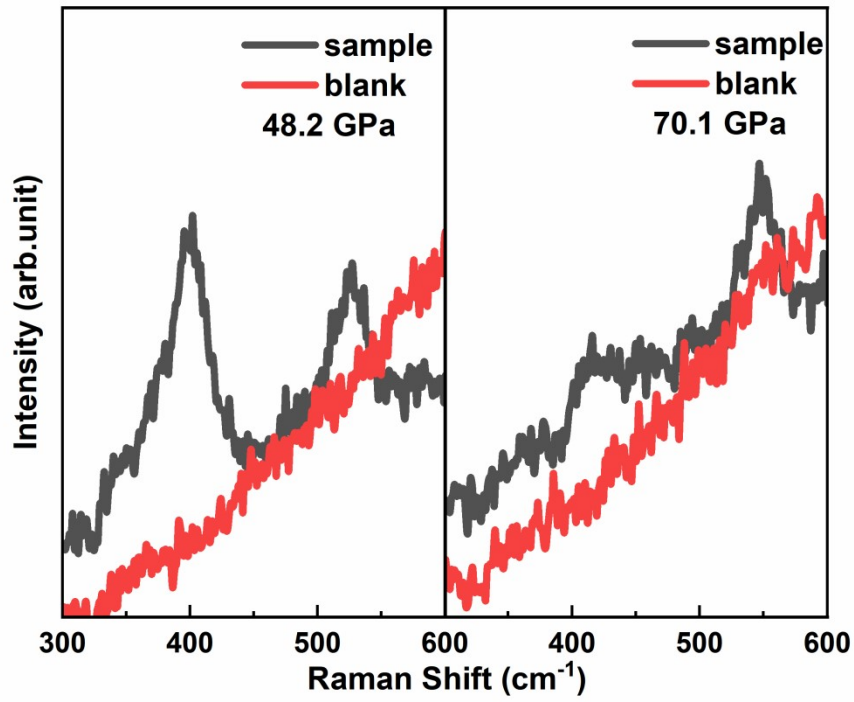

Figure S2: To distinguish true heterojunction signals, the target region signal is compared with the blank area signal under 48.2 and 70.1 GPa.

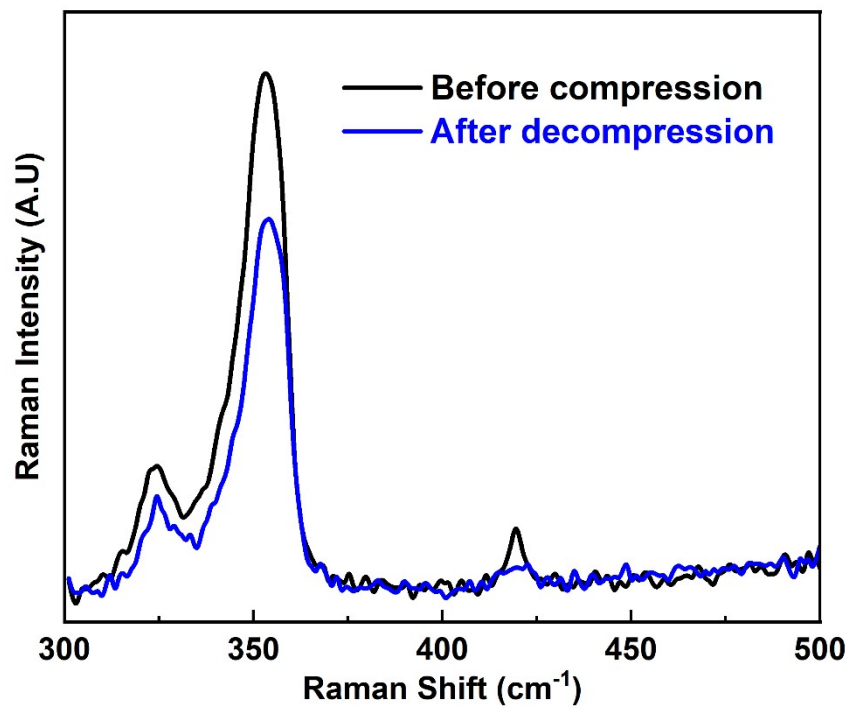

Figure S3: Comparison of Raman data before compression and after decompression.

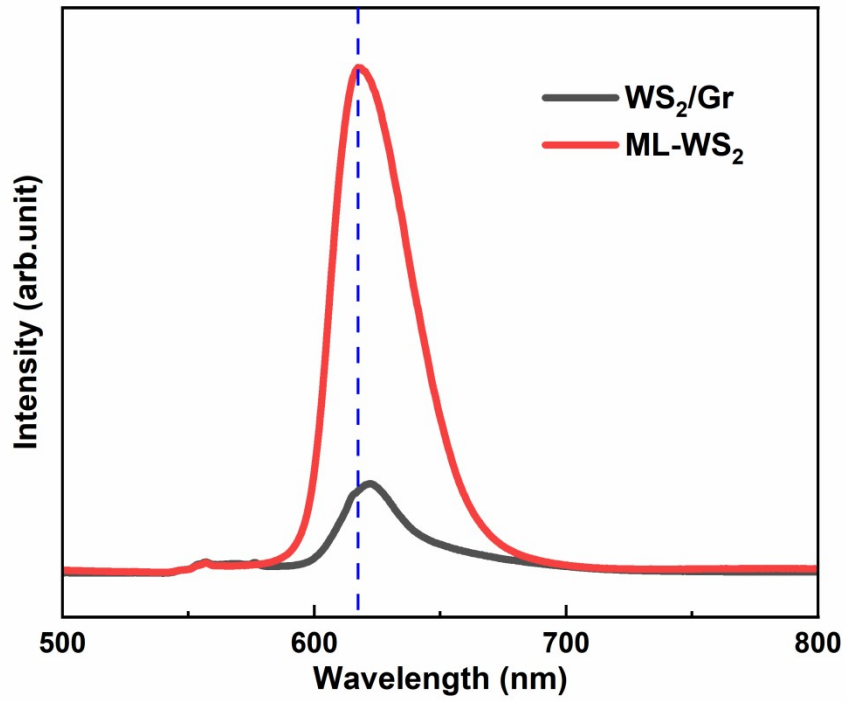

Figure S4: Comparing the PL spectra of WS<sub>2</sub> in the heterojunction with the monolayer WS<sub>2</sub> alone, it can be found that the exciton behavior is significantly weakened after the formation of heterojunction with graphene.
